# Supplementary material for: Levansucrase from Bacillus amyloliquefaciens KK9 and Its Y237S Variant Producing the High Bioactive Levan-Type Fructooligosaccharides
Source: PubMed Central journal article supplement (PMC7277640; doi:10.3390/biom10050692), 2020-04-29
Supplement: biomolecules-10-00692-s001.pdf [file biomolecules-10-00692-s001.pdf]

## Supporting information

# Levansucrase from *Bacillus amyloliquefaciens* KK9 and its Y237S variant producing the high bioactive levant-type fructooligosaccharides

Pongsakorn Phengnoi <sup>1</sup>, Thanapon Charoenwongpaiboon <sup>2</sup>, Karan Wangpaiboon <sup>3</sup>, Methus Klaewkla <sup>3</sup>, Santhana Nakapong <sup>4</sup>, Wonnop Visessanguan <sup>5</sup>, Kazuo Ito <sup>6</sup>, Rath Pichyangkura <sup>3</sup> and Kamontip Kuttiyawong <sup>1,\*</sup>

<sup>1</sup> Department of Chemistry, Faculty of Liberal Arts and Science, Kasetsart University, Kamphaeng Saen Campus, Nakhon Pathom, 73140, Thailand; pkphe@hotmail.com

<sup>2</sup> Department of Chemistry, Faculty of Science, Silpakorn University, Nakhon Pathom, 73000, Thailand; thanapon.charoenwongpaiboon@gmail.com

<sup>3</sup> Department of Biochemistry, Faculty of Science, Chulalongkorn University, Bangkok, 10330, Thailand; wangpaiboon9@gmail.com (K.W.); methus.kanon@gmail.com (M.K.); prath@chula.ac.th (R.P.)

<sup>4</sup> Department of Chemistry, Faculty of Science, Ramkhamhaeng University, Bangkok, 10240, Thailand; santhana@ru.ac.th

<sup>5</sup> National Center for Genetic Engineering and Biotechnology, National Science and Technology Development Agency, Pathumthani, 12120, Thailand; wonnop@biotec.or.th

<sup>6</sup> Graduate School of Science, Osaka City University, Osaka, 558-8585, Japan; ito@sci.osaka-cu.ac.jp

\* Correspondence: kamontip.k@ku.ac.th.

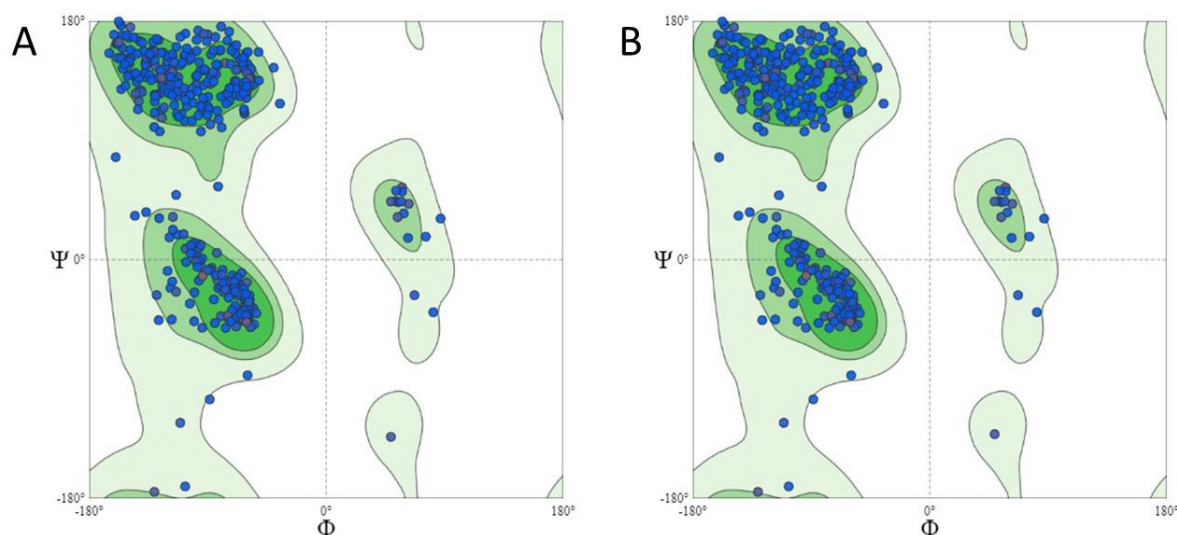

**Figure S1.** Ramachandran Plot for homology modeling of (A) wild-type and (B) Y237S mutant LsKK9.

Table S1. LsKK9 purification data.

| Step         | Total activity (U) | Total protein (mg) | Specific activity (U/mg) | Fold | Recovery (%) |
|--------------|--------------------|--------------------|--------------------------|------|--------------|
| Wild type    |                    |                    |                          |      |              |
| Crude        | 1850               | 22.6               | 81.9                     | -    | 100          |
| CM toyopearl | 1021               | 6.7                | 152.4                    | 1.9  | 55           |
| Y237S        |                    |                    |                          |      |              |
| Crude        | 2368               | 25.9               | 91.4                     | -    | 100          |
| CM toyopearl | 969                | 9.4                | 103.5                    | 1.1  | 41           |

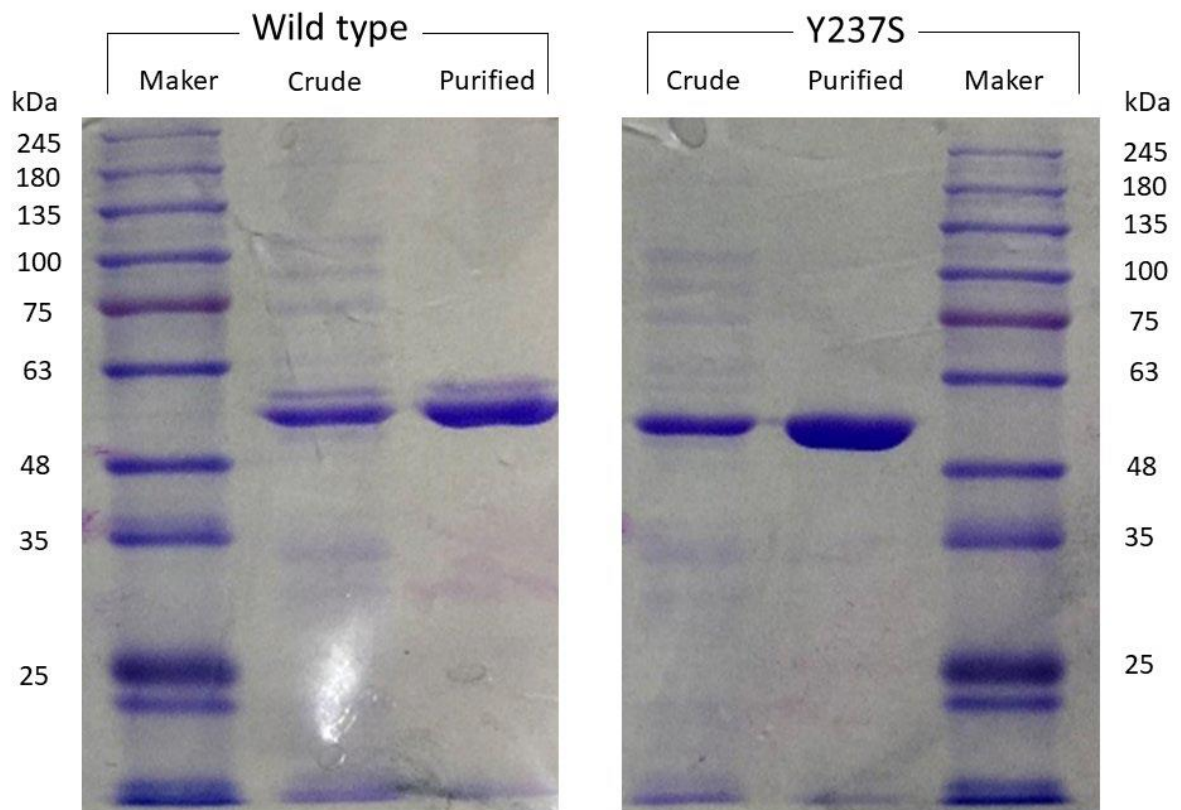

Figure S2. SDS-PAGE of purified wild-type and Y237S mutant LsKK9.
